# Supplementary material for: Evaluation and comparison of statistical methods for early temporal detection of outbreaks: A simulation-based study
Source: PubMed Central journal article supplement (PMC5513450; doi:10.1371/journal.pone.0181227), 2017-07-17

# Evaluation and Comparison of Statistical Methods for Early Temporal Detection of Outbreaks: a Simulation-Based Study

## Appendix S1: Comparison of the 21 evaluated methods ( $\alpha = 0.01$ for Improved Farrington, Original Farrington, Periodic Poisson GLM and Neg Binomial GLM, CDC and EARS C1-C3, $\alpha = 0.05$ for Bayes 1-3, $k_1 = 5$ )

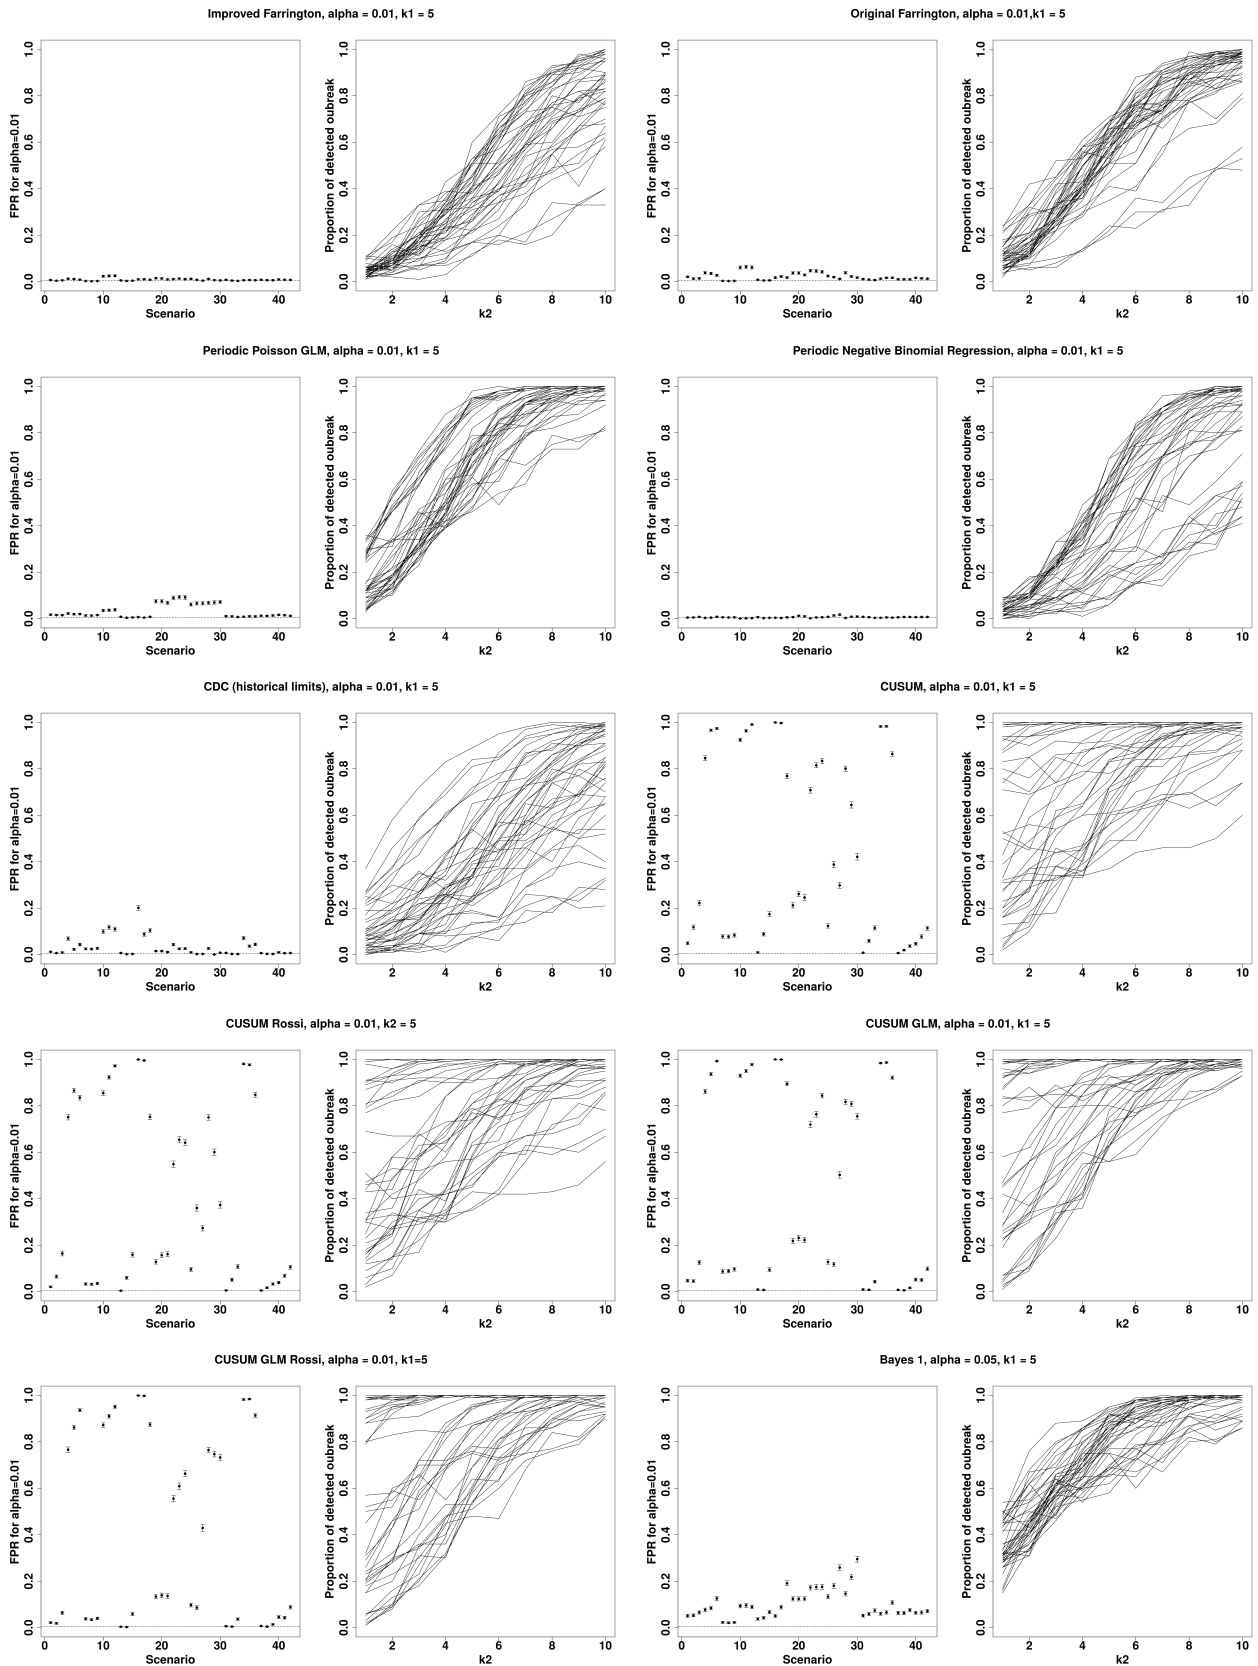

Bayes 2,  $\alpha = 0.05, k_1 = 5$

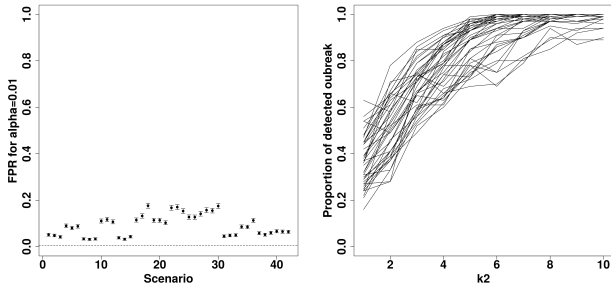

Bayes 3,  $\alpha = 0.05, k_1 = 5$

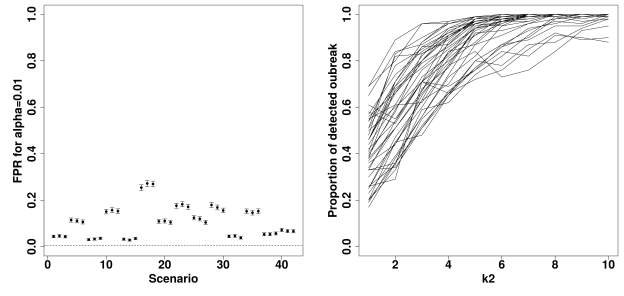

RK1 1,  $k_1 = 5$

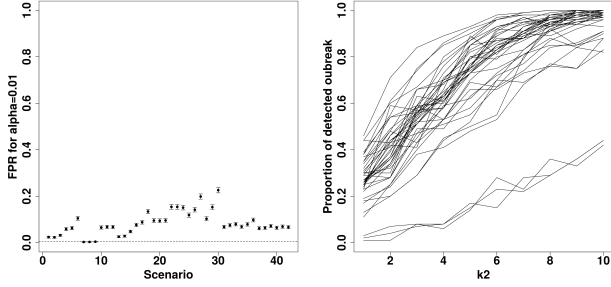

RK1 2,  $k_1 = 5$

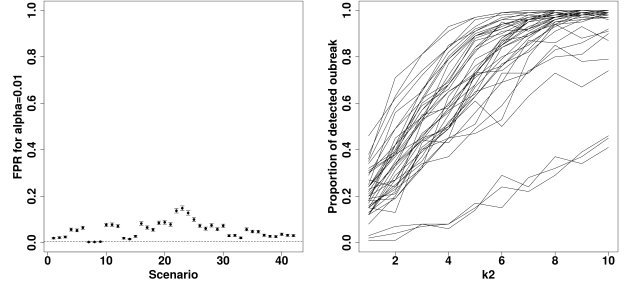

RK1 3,  $k_1 = 5$

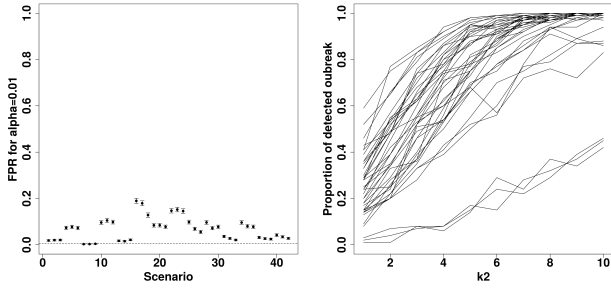

GLR Negative Binomiale,  $k_1 = 5$

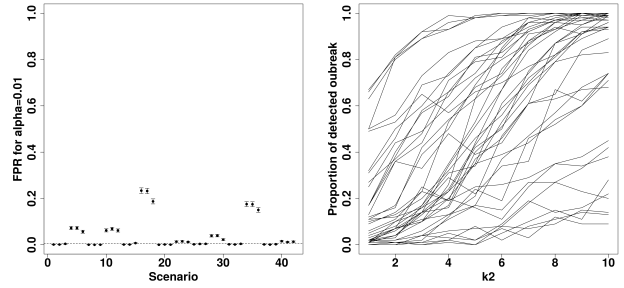

GLR Poisson,  $k_1 = 5$

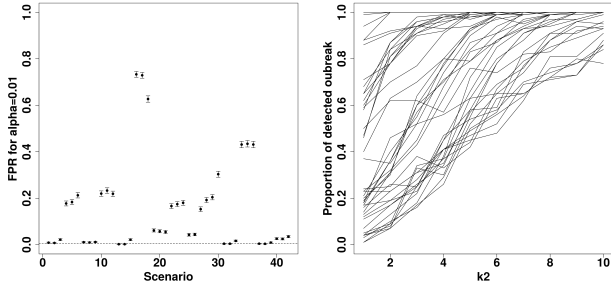

EARS C1,  $\alpha = 0.01, k_1 = 5$

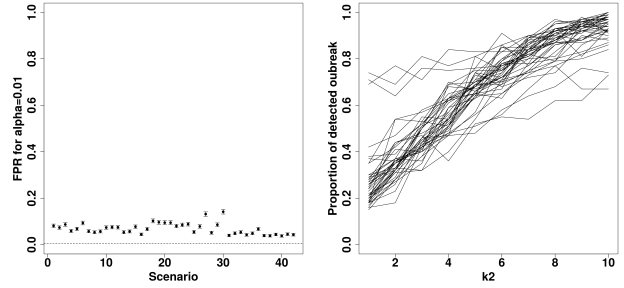

EARS C2,  $\alpha = 0.01, k_1 = 5$

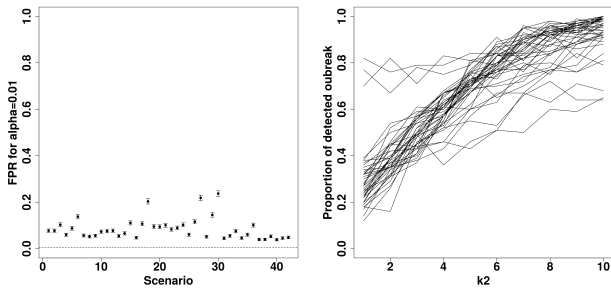

EARS C3,  $\alpha = 0.01, k_1 = 5$

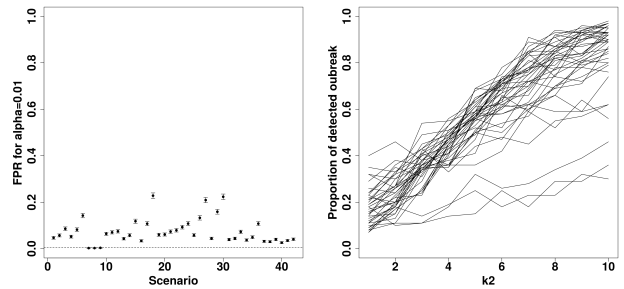

OutbreakP,  $k_1 = 5$

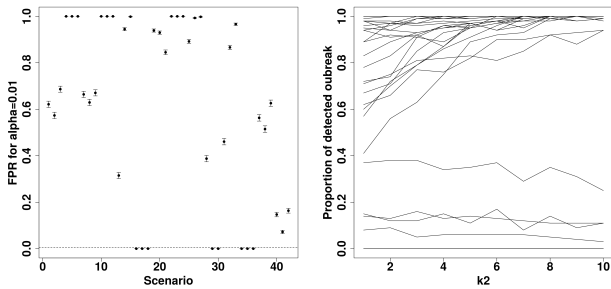

Supplement: pone.0181227.s001.pdf [file pone.0181227.s001.pdf]
