# Supplementary material for: Evaluation and comparison of statistical methods for early temporal detection of outbreaks: A simulation-based study
Source: PubMed Central journal article supplement (PMC5513450; doi:10.1371/journal.pone.0181227), 2017-07-17
Supplement: pone.0181227.s015.pdf [file pone.0181227.s015.pdf]

# Evaluation and Comparison of Statistical Methods for Early Temporal Detection of Outbreaks: a Simulation-Based Study

## Appendix S15: Overall performances of RKI 2 algorithm

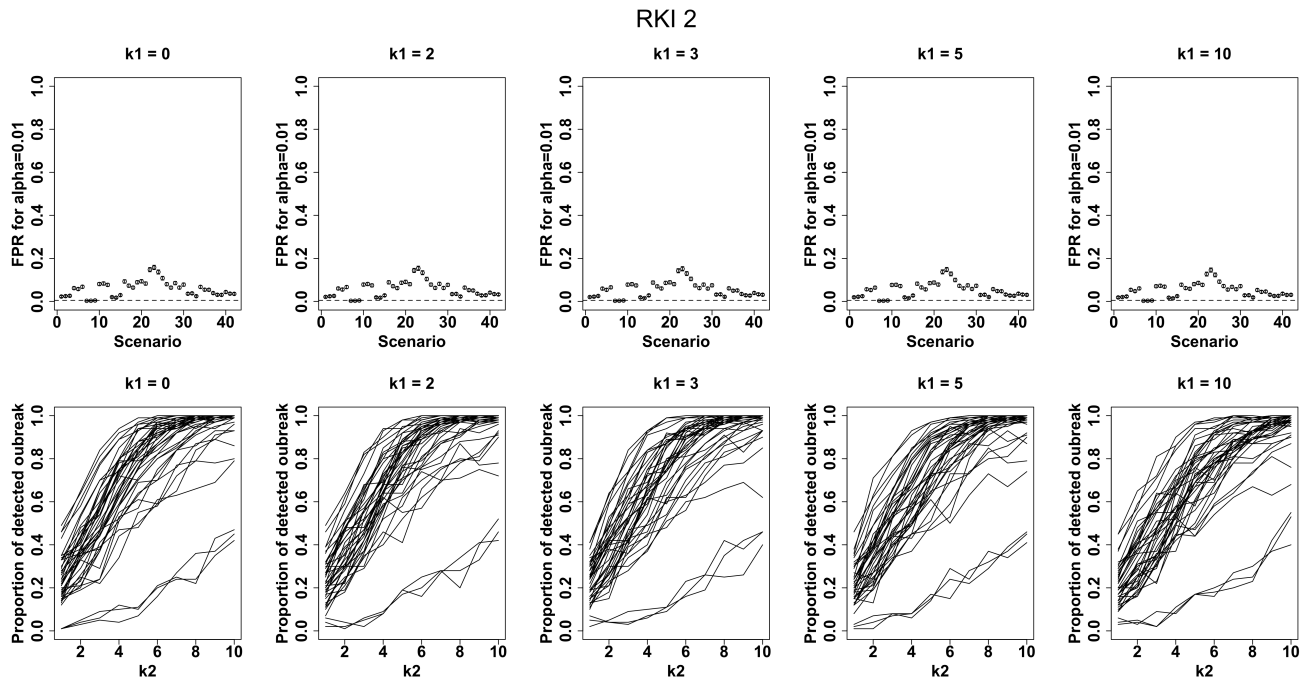

Figure 1: RKI 2 algorithm performances by increasing past outbreak amplitude  $k_1 = 0, 2, 3, 5$  or  $10$  with (i) on the first row: false positive rate for 42 simulated scenarios, (ii) on the second row: probability of detection for 42 simulated scenarios (each curve corresponding to a scenario) by increasing current outbreak amplitude  $k_2 = 1$  to  $10$ .

## Overall performances of RKI 2 algorithm

|    | FPR k1=0 | FPR k1=2 | FPR k1=3 | FPR k1=5 | FPR k1=10 |
|----|----------|----------|----------|----------|-----------|
| 1  | 0.02     | 0.02     | 0.02     | 0.02     | 0.02      |
| 2  | 0.02     | 0.02     | 0.02     | 0.02     | 0.02      |
| 3  | 0.03     | 0.03     | 0.03     | 0.02     | 0.02      |
| 4  | 0.06     | 0.06     | 0.06     | 0.06     | 0.05      |
| 5  | 0.06     | 0.06     | 0.05     | 0.05     | 0.05      |
| 6  | 0.07     | 0.07     | 0.07     | 0.06     | 0.06      |
| 7  | 0.00     | 0.00     | 0.00     | 0.00     | 0.00      |
| 8  | 0.00     | 0.00     | 0.00     | 0.00     | 0.00      |
| 9  | 0.00     | 0.00     | 0.00     | 0.00     | 0.00      |
| 10 | 0.08     | 0.08     | 0.08     | 0.08     | 0.07      |
| 11 | 0.08     | 0.08     | 0.08     | 0.08     | 0.07      |
| 12 | 0.08     | 0.07     | 0.07     | 0.07     | 0.07      |
| 13 | 0.02     | 0.02     | 0.02     | 0.02     | 0.02      |
| 14 | 0.02     | 0.02     | 0.02     | 0.02     | 0.01      |
| 15 | 0.03     | 0.03     | 0.03     | 0.03     | 0.02      |
| 16 | 0.09     | 0.09     | 0.09     | 0.08     | 0.08      |
| 17 | 0.07     | 0.07     | 0.07     | 0.07     | 0.06      |
| 18 | 0.06     | 0.06     | 0.06     | 0.06     | 0.06      |
| 19 | 0.09     | 0.09     | 0.09     | 0.09     | 0.08      |
| 20 | 0.09     | 0.09     | 0.09     | 0.09     | 0.09      |
| 21 | 0.08     | 0.08     | 0.08     | 0.08     | 0.08      |
| 22 | 0.15     | 0.14     | 0.14     | 0.14     | 0.13      |
| 23 | 0.16     | 0.15     | 0.15     | 0.15     | 0.15      |
| 24 | 0.14     | 0.13     | 0.13     | 0.13     | 0.12      |
| 25 | 0.11     | 0.10     | 0.10     | 0.10     | 0.09      |
| 26 | 0.08     | 0.08     | 0.07     | 0.07     | 0.07      |
| 27 | 0.06     | 0.06     | 0.06     | 0.06     | 0.06      |
| 28 | 0.09     | 0.08     | 0.08     | 0.07     | 0.07      |
| 29 | 0.06     | 0.06     | 0.06     | 0.06     | 0.06      |
| 30 | 0.08     | 0.08     | 0.07     | 0.07     | 0.07      |
| 31 | 0.04     | 0.03     | 0.03     | 0.03     | 0.03      |
| 32 | 0.04     | 0.03     | 0.03     | 0.03     | 0.03      |
| 33 | 0.02     | 0.02     | 0.02     | 0.02     | 0.02      |
| 34 | 0.07     | 0.06     | 0.06     | 0.06     | 0.05      |
| 35 | 0.05     | 0.05     | 0.05     | 0.05     | 0.04      |
| 36 | 0.05     | 0.05     | 0.05     | 0.05     | 0.05      |
| 37 | 0.04     | 0.04     | 0.03     | 0.03     | 0.03      |
| 38 | 0.03     | 0.03     | 0.03     | 0.03     | 0.03      |
| 39 | 0.03     | 0.03     | 0.03     | 0.03     | 0.03      |
| 40 | 0.04     | 0.04     | 0.04     | 0.04     | 0.04      |
| 41 | 0.04     | 0.03     | 0.03     | 0.03     | 0.03      |
| 42 | 0.04     | 0.03     | 0.03     | 0.03     | 0.03      |

Table 1: FPR according to each scenario and each k1 value

|    | k2=1 | k2=2 | k2=3 | k2=4 | k2=5 | k2=6 | k2=7 | k2=8 | k2=9 | k2=10 |
|----|------|------|------|------|------|------|------|------|------|-------|
| 1  | 0.17 | 0.25 | 0.22 | 0.34 | 0.55 | 0.58 | 0.72 | 0.79 | 0.91 | 0.93  |
| 2  | 0.20 | 0.21 | 0.24 | 0.51 | 0.64 | 0.70 | 0.76 | 0.87 | 0.89 | 0.96  |
| 3  | 0.15 | 0.19 | 0.24 | 0.44 | 0.50 | 0.59 | 0.65 | 0.84 | 0.89 | 0.86  |
| 4  | 0.27 | 0.44 | 0.58 | 0.78 | 0.81 | 0.92 | 0.96 | 1.00 | 0.97 | 1.00  |
| 5  | 0.35 | 0.40 | 0.59 | 0.79 | 0.79 | 0.84 | 0.92 | 0.99 | 0.99 | 1.00  |
| 6  | 0.28 | 0.37 | 0.44 | 0.62 | 0.75 | 0.82 | 0.87 | 0.92 | 0.99 | 0.99  |
| 7  | 0.01 | 0.05 | 0.09 | 0.10 | 0.11 | 0.20 | 0.24 | 0.24 | 0.35 | 0.42  |
| 8  | 0.01 | 0.04 | 0.06 | 0.12 | 0.10 | 0.21 | 0.25 | 0.22 | 0.43 | 0.47  |
| 9  | 0.01 | 0.03 | 0.05 | 0.04 | 0.07 | 0.16 | 0.27 | 0.36 | 0.37 | 0.45  |
| 10 | 0.33 | 0.46 | 0.57 | 0.73 | 0.88 | 0.92 | 0.94 | 0.97 | 1.00 | 1.00  |
| 11 | 0.33 | 0.41 | 0.66 | 0.85 | 0.94 | 0.94 | 0.99 | 0.99 | 0.97 | 1.00  |
| 12 | 0.30 | 0.43 | 0.64 | 0.75 | 0.85 | 0.95 | 0.97 | 1.00 | 0.97 | 1.00  |
| 13 | 0.12 | 0.24 | 0.37 | 0.58 | 0.70 | 0.80 | 0.85 | 0.92 | 0.99 | 0.99  |
| 14 | 0.16 | 0.20 | 0.41 | 0.51 | 0.63 | 0.73 | 0.84 | 0.91 | 0.95 | 0.97  |
| 15 | 0.17 | 0.33 | 0.29 | 0.53 | 0.57 | 0.75 | 0.84 | 0.93 | 0.97 | 1.00  |
| 16 | 0.35 | 0.54 | 0.70 | 0.79 | 0.93 | 0.99 | 0.98 | 1.00 | 1.00 | 1.00  |
| 17 | 0.34 | 0.38 | 0.56 | 0.80 | 0.86 | 0.94 | 0.94 | 0.99 | 0.98 | 1.00  |
| 18 | 0.33 | 0.36 | 0.47 | 0.52 | 0.69 | 0.70 | 0.84 | 0.86 | 0.93 | 0.93  |
| 19 | 0.27 | 0.44 | 0.66 | 0.80 | 0.96 | 0.97 | 0.99 | 1.00 | 1.00 | 1.00  |
| 20 | 0.33 | 0.49 | 0.60 | 0.80 | 0.88 | 0.97 | 0.99 | 0.98 | 1.00 | 1.00  |
| 21 | 0.21 | 0.44 | 0.54 | 0.75 | 0.84 | 0.97 | 0.95 | 1.00 | 1.00 | 1.00  |
| 22 | 0.46 | 0.65 | 0.84 | 0.94 | 0.99 | 0.99 | 1.00 | 1.00 | 1.00 | 1.00  |
| 23 | 0.49 | 0.64 | 0.81 | 0.92 | 0.96 | 0.99 | 1.00 | 1.00 | 1.00 | 1.00  |
| 24 | 0.43 | 0.61 | 0.78 | 0.89 | 0.97 | 1.00 | 1.00 | 1.00 | 1.00 | 1.00  |
| 25 | 0.46 | 0.58 | 0.77 | 0.89 | 0.93 | 0.98 | 1.00 | 1.00 | 1.00 | 1.00  |
| 26 | 0.26 | 0.42 | 0.57 | 0.70 | 0.85 | 0.91 | 0.95 | 0.98 | 1.00 | 0.99  |
| 27 | 0.23 | 0.36 | 0.38 | 0.55 | 0.61 | 0.59 | 0.77 | 0.79 | 0.78 | 0.80  |
| 28 | 0.29 | 0.53 | 0.70 | 0.74 | 0.82 | 0.95 | 0.97 | 0.99 | 0.99 | 1.00  |
| 29 | 0.21 | 0.37 | 0.47 | 0.72 | 0.70 | 0.80 | 0.86 | 0.95 | 0.94 | 0.99  |
| 30 | 0.22 | 0.35 | 0.39 | 0.47 | 0.48 | 0.61 | 0.63 | 0.66 | 0.69 | 0.79  |
| 31 | 0.13 | 0.36 | 0.44 | 0.64 | 0.84 | 0.96 | 0.97 | 0.99 | 0.99 | 1.00  |
| 32 | 0.18 | 0.34 | 0.46 | 0.62 | 0.75 | 0.96 | 0.94 | 0.98 | 0.99 | 1.00  |
| 33 | 0.14 | 0.21 | 0.37 | 0.58 | 0.71 | 0.82 | 0.92 | 0.96 | 0.97 | 0.99  |
| 34 | 0.24 | 0.48 | 0.54 | 0.74 | 0.94 | 0.96 | 0.98 | 1.00 | 1.00 | 1.00  |
| 35 | 0.28 | 0.37 | 0.57 | 0.72 | 0.88 | 0.90 | 0.96 | 0.99 | 0.99 | 1.00  |
| 36 | 0.19 | 0.29 | 0.45 | 0.59 | 0.76 | 0.86 | 0.92 | 0.95 | 0.99 | 0.99  |
| 37 | 0.14 | 0.39 | 0.49 | 0.67 | 0.80 | 0.87 | 0.96 | 0.98 | 0.99 | 1.00  |
| 38 | 0.18 | 0.23 | 0.47 | 0.63 | 0.78 | 0.87 | 0.96 | 0.97 | 1.00 | 1.00  |
| 39 | 0.16 | 0.34 | 0.51 | 0.65 | 0.78 | 0.86 | 0.93 | 0.99 | 1.00 | 1.00  |
| 40 | 0.24 | 0.38 | 0.53 | 0.75 | 0.81 | 0.93 | 0.97 | 1.00 | 0.99 | 1.00  |
| 41 | 0.23 | 0.33 | 0.44 | 0.65 | 0.83 | 0.89 | 0.97 | 1.00 | 1.00 | 1.00  |
| 42 | 0.14 | 0.26 | 0.38 | 0.58 | 0.76 | 0.90 | 0.98 | 0.94 | 0.99 | 1.00  |

Table 2: POD according to each scenario and each k2 value, k1 = 0

|    | k2=1 | k2=2 | k2=3 | k2=4 | k2=5 | k2=6 | k2=7 | k2=8 | k2=9 | k2=10 |
|----|------|------|------|------|------|------|------|------|------|-------|
| 1  | 0.13 | 0.18 | 0.35 | 0.40 | 0.52 | 0.62 | 0.69 | 0.78 | 0.83 | 0.92  |
| 2  | 0.15 | 0.25 | 0.29 | 0.43 | 0.62 | 0.70 | 0.76 | 0.79 | 0.81 | 0.93  |
| 3  | 0.11 | 0.21 | 0.34 | 0.46 | 0.41 | 0.66 | 0.75 | 0.80 | 0.79 | 0.90  |
| 4  | 0.32 | 0.43 | 0.55 | 0.68 | 0.86 | 0.90 | 0.96 | 1.00 | 0.99 | 1.00  |
| 5  | 0.29 | 0.43 | 0.56 | 0.73 | 0.82 | 0.91 | 0.92 | 0.98 | 0.98 | 0.99  |
| 6  | 0.16 | 0.41 | 0.51 | 0.64 | 0.64 | 0.81 | 0.88 | 0.91 | 0.97 | 0.97  |
| 7  | 0.06 | 0.04 | 0.02 | 0.08 | 0.19 | 0.16 | 0.27 | 0.34 | 0.41 | 0.42  |
| 8  | 0.02 | 0.02 | 0.05 | 0.08 | 0.19 | 0.25 | 0.28 | 0.28 | 0.33 | 0.46  |
| 9  | 0.04 | 0.01 | 0.06 | 0.09 | 0.17 | 0.20 | 0.28 | 0.20 | 0.40 | 0.52  |
| 10 | 0.31 | 0.50 | 0.66 | 0.80 | 0.83 | 0.95 | 0.96 | 0.98 | 1.00 | 1.00  |
| 11 | 0.37 | 0.46 | 0.68 | 0.69 | 0.92 | 0.94 | 0.97 | 0.98 | 1.00 | 1.00  |
| 12 | 0.25 | 0.51 | 0.57 | 0.71 | 0.89 | 0.96 | 0.98 | 0.99 | 0.97 | 0.99  |
| 13 | 0.17 | 0.19 | 0.36 | 0.56 | 0.77 | 0.79 | 0.87 | 0.90 | 0.98 | 0.98  |
| 14 | 0.07 | 0.24 | 0.37 | 0.52 | 0.58 | 0.76 | 0.87 | 0.92 | 0.98 | 0.98  |
| 15 | 0.22 | 0.30 | 0.30 | 0.53 | 0.76 | 0.75 | 0.78 | 0.94 | 0.92 | 0.96  |
| 16 | 0.39 | 0.51 | 0.67 | 0.80 | 0.95 | 0.96 | 0.99 | 1.00 | 1.00 | 1.00  |
| 17 | 0.31 | 0.35 | 0.64 | 0.78 | 0.88 | 0.89 | 0.96 | 0.98 | 1.00 | 0.99  |
| 18 | 0.23 | 0.36 | 0.45 | 0.57 | 0.71 | 0.76 | 0.81 | 0.88 | 0.89 | 0.91  |
| 19 | 0.32 | 0.48 | 0.61 | 0.85 | 0.92 | 0.98 | 1.00 | 1.00 | 1.00 | 1.00  |
| 20 | 0.29 | 0.47 | 0.65 | 0.83 | 0.88 | 0.97 | 0.99 | 0.97 | 1.00 | 1.00  |
| 21 | 0.30 | 0.30 | 0.56 | 0.72 | 0.83 | 0.91 | 0.98 | 0.99 | 0.99 | 1.00  |
| 22 | 0.39 | 0.62 | 0.80 | 0.94 | 0.94 | 1.00 | 1.00 | 1.00 | 1.00 | 1.00  |
| 23 | 0.46 | 0.59 | 0.83 | 0.90 | 0.98 | 1.00 | 1.00 | 1.00 | 1.00 | 1.00  |
| 24 | 0.49 | 0.64 | 0.82 | 0.88 | 0.94 | 0.99 | 1.00 | 1.00 | 1.00 | 1.00  |
| 25 | 0.36 | 0.56 | 0.73 | 0.93 | 0.98 | 0.98 | 1.00 | 1.00 | 1.00 | 1.00  |
| 26 | 0.26 | 0.48 | 0.59 | 0.70 | 0.82 | 0.93 | 0.96 | 0.97 | 1.00 | 0.99  |
| 27 | 0.18 | 0.23 | 0.42 | 0.59 | 0.63 | 0.74 | 0.70 | 0.87 | 0.77 | 0.78  |
| 28 | 0.27 | 0.46 | 0.52 | 0.74 | 0.88 | 0.94 | 0.99 | 0.98 | 0.99 | 1.00  |
| 29 | 0.26 | 0.39 | 0.47 | 0.58 | 0.70 | 0.77 | 0.93 | 0.92 | 0.95 | 0.97  |
| 30 | 0.27 | 0.30 | 0.37 | 0.62 | 0.55 | 0.57 | 0.70 | 0.71 | 0.75 | 0.72  |
| 31 | 0.20 | 0.33 | 0.44 | 0.69 | 0.79 | 0.93 | 0.97 | 1.00 | 1.00 | 1.00  |
| 32 | 0.18 | 0.34 | 0.56 | 0.64 | 0.86 | 0.89 | 0.93 | 0.98 | 0.97 | 0.98  |
| 33 | 0.10 | 0.23 | 0.40 | 0.57 | 0.74 | 0.80 | 0.90 | 0.97 | 0.99 | 0.99  |
| 34 | 0.32 | 0.48 | 0.63 | 0.82 | 0.87 | 0.95 | 0.98 | 1.00 | 1.00 | 1.00  |
| 35 | 0.20 | 0.38 | 0.47 | 0.65 | 0.82 | 0.92 | 0.98 | 0.99 | 1.00 | 1.00  |
| 36 | 0.22 | 0.31 | 0.46 | 0.68 | 0.68 | 0.85 | 0.94 | 0.97 | 0.96 | 0.98  |
| 37 | 0.19 | 0.29 | 0.42 | 0.63 | 0.85 | 0.87 | 0.95 | 0.98 | 1.00 | 1.00  |
| 38 | 0.12 | 0.30 | 0.46 | 0.65 | 0.78 | 0.91 | 0.97 | 0.99 | 1.00 | 1.00  |
| 39 | 0.11 | 0.30 | 0.37 | 0.65 | 0.76 | 0.89 | 0.96 | 0.97 | 0.99 | 0.99  |
| 40 | 0.22 | 0.48 | 0.48 | 0.67 | 0.89 | 0.95 | 0.98 | 0.98 | 0.99 | 1.00  |
| 41 | 0.21 | 0.22 | 0.52 | 0.61 | 0.74 | 0.94 | 0.99 | 0.98 | 1.00 | 1.00  |
| 42 | 0.19 | 0.28 | 0.42 | 0.65 | 0.71 | 0.89 | 0.96 | 0.98 | 0.98 | 0.99  |

Table 3: POD according to each scenario and each k2 value, k1 = 2

|    | k2=1 | k2=2 | k2=3 | k2=4 | k2=5 | k2=6 | k2=7 | k2=8 | k2=9 | k2=10 |
|----|------|------|------|------|------|------|------|------|------|-------|
| 1  | 0.19 | 0.21 | 0.34 | 0.40 | 0.62 | 0.62 | 0.75 | 0.86 | 0.89 | 0.93  |
| 2  | 0.10 | 0.30 | 0.30 | 0.37 | 0.53 | 0.67 | 0.78 | 0.81 | 0.86 | 0.90  |
| 3  | 0.11 | 0.23 | 0.28 | 0.38 | 0.51 | 0.56 | 0.72 | 0.83 | 0.86 | 0.93  |
| 4  | 0.24 | 0.43 | 0.53 | 0.72 | 0.77 | 0.95 | 0.97 | 0.97 | 0.98 | 0.99  |
| 5  | 0.30 | 0.40 | 0.53 | 0.75 | 0.79 | 0.84 | 0.93 | 0.98 | 0.99 | 0.99  |
| 6  | 0.25 | 0.42 | 0.42 | 0.62 | 0.59 | 0.77 | 0.87 | 0.94 | 0.93 | 0.99  |
| 7  | 0.07 | 0.04 | 0.04 | 0.06 | 0.11 | 0.16 | 0.19 | 0.35 | 0.42 | 0.46  |
| 8  | 0.05 | 0.04 | 0.03 | 0.07 | 0.09 | 0.17 | 0.26 | 0.25 | 0.26 | 0.40  |
| 9  | 0.02 | 0.05 | 0.09 | 0.10 | 0.11 | 0.23 | 0.26 | 0.42 | 0.38 | 0.46  |
| 10 | 0.32 | 0.44 | 0.61 | 0.83 | 0.87 | 0.97 | 0.98 | 0.99 | 0.99 | 1.00  |
| 11 | 0.31 | 0.46 | 0.63 | 0.83 | 0.87 | 0.94 | 0.96 | 0.99 | 1.00 | 1.00  |
| 12 | 0.34 | 0.38 | 0.59 | 0.73 | 0.92 | 0.90 | 0.94 | 1.00 | 0.99 | 0.99  |
| 13 | 0.12 | 0.27 | 0.36 | 0.50 | 0.69 | 0.78 | 0.87 | 0.93 | 0.97 | 1.00  |
| 14 | 0.13 | 0.15 | 0.39 | 0.44 | 0.61 | 0.75 | 0.80 | 0.88 | 0.93 | 0.96  |
| 15 | 0.13 | 0.18 | 0.47 | 0.49 | 0.54 | 0.70 | 0.81 | 0.87 | 0.97 | 0.93  |
| 16 | 0.35 | 0.48 | 0.74 | 0.84 | 0.87 | 0.94 | 0.97 | 0.98 | 1.00 | 1.00  |
| 17 | 0.25 | 0.53 | 0.63 | 0.77 | 0.89 | 0.89 | 0.95 | 0.97 | 0.99 | 1.00  |
| 18 | 0.15 | 0.24 | 0.42 | 0.61 | 0.63 | 0.76 | 0.82 | 0.91 | 0.83 | 0.93  |
| 19 | 0.28 | 0.51 | 0.69 | 0.84 | 0.90 | 0.94 | 1.00 | 0.99 | 1.00 | 1.00  |
| 20 | 0.32 | 0.49 | 0.68 | 0.79 | 0.91 | 0.93 | 0.99 | 1.00 | 1.00 | 1.00  |
| 21 | 0.24 | 0.48 | 0.57 | 0.68 | 0.88 | 0.94 | 0.96 | 1.00 | 1.00 | 1.00  |
| 22 | 0.41 | 0.63 | 0.81 | 0.92 | 0.99 | 1.00 | 1.00 | 1.00 | 1.00 | 1.00  |
| 23 | 0.41 | 0.60 | 0.84 | 0.93 | 0.99 | 0.99 | 1.00 | 1.00 | 1.00 | 1.00  |
| 24 | 0.38 | 0.64 | 0.74 | 0.93 | 0.97 | 0.99 | 0.99 | 1.00 | 1.00 | 1.00  |
| 25 | 0.30 | 0.59 | 0.73 | 0.91 | 0.94 | 0.99 | 1.00 | 1.00 | 1.00 | 1.00  |
| 26 | 0.31 | 0.42 | 0.59 | 0.63 | 0.86 | 0.93 | 0.91 | 0.98 | 0.97 | 1.00  |
| 27 | 0.19 | 0.26 | 0.40 | 0.50 | 0.60 | 0.63 | 0.69 | 0.77 | 0.78 | 0.85  |
| 28 | 0.28 | 0.41 | 0.66 | 0.69 | 0.85 | 0.95 | 0.97 | 1.00 | 1.00 | 1.00  |
| 29 | 0.25 | 0.33 | 0.53 | 0.59 | 0.80 | 0.81 | 0.84 | 0.90 | 0.95 | 0.97  |
| 30 | 0.24 | 0.38 | 0.36 | 0.45 | 0.48 | 0.60 | 0.62 | 0.66 | 0.69 | 0.62  |
| 31 | 0.19 | 0.31 | 0.44 | 0.58 | 0.78 | 0.94 | 0.94 | 0.99 | 0.99 | 1.00  |
| 32 | 0.14 | 0.37 | 0.41 | 0.67 | 0.75 | 0.83 | 0.91 | 0.98 | 0.99 | 1.00  |
| 33 | 0.15 | 0.21 | 0.43 | 0.46 | 0.66 | 0.82 | 0.94 | 0.94 | 0.97 | 0.98  |
| 34 | 0.24 | 0.42 | 0.53 | 0.75 | 0.87 | 0.96 | 1.00 | 0.98 | 1.00 | 1.00  |
| 35 | 0.26 | 0.44 | 0.61 | 0.67 | 0.88 | 0.90 | 0.97 | 0.99 | 1.00 | 1.00  |
| 36 | 0.18 | 0.31 | 0.51 | 0.65 | 0.74 | 0.86 | 0.92 | 0.97 | 0.96 | 0.99  |
| 37 | 0.18 | 0.30 | 0.52 | 0.61 | 0.75 | 0.92 | 0.98 | 0.96 | 0.99 | 1.00  |
| 38 | 0.15 | 0.24 | 0.40 | 0.66 | 0.74 | 0.89 | 0.94 | 0.96 | 1.00 | 1.00  |
| 39 | 0.16 | 0.26 | 0.45 | 0.61 | 0.77 | 0.91 | 0.91 | 0.97 | 1.00 | 0.99  |
| 40 | 0.22 | 0.40 | 0.50 | 0.73 | 0.74 | 0.87 | 0.95 | 1.00 | 0.99 | 1.00  |
| 41 | 0.12 | 0.28 | 0.47 | 0.64 | 0.71 | 0.90 | 0.95 | 0.96 | 0.99 | 1.00  |
| 42 | 0.20 | 0.40 | 0.42 | 0.54 | 0.80 | 0.85 | 0.96 | 0.97 | 0.99 | 1.00  |

Table 4: POD according to each scenario and each k2 value, k1 = 3

|    | k2=1 | k2=2 | k2=3 | k2=4 | k2=5 | k2=6 | k2=7 | k2=8 | k2=9 | k2=10 |
|----|------|------|------|------|------|------|------|------|------|-------|
| 1  | 0.12 | 0.19 | 0.33 | 0.45 | 0.47 | 0.53 | 0.80 | 0.94 | 0.88 | 0.91  |
| 2  | 0.18 | 0.19 | 0.32 | 0.45 | 0.51 | 0.73 | 0.73 | 0.83 | 0.86 | 0.92  |
| 3  | 0.15 | 0.25 | 0.34 | 0.37 | 0.49 | 0.59 | 0.74 | 0.80 | 0.81 | 0.90  |
| 4  | 0.31 | 0.38 | 0.53 | 0.68 | 0.84 | 0.91 | 0.92 | 1.00 | 1.00 | 1.00  |
| 5  | 0.18 | 0.42 | 0.59 | 0.66 | 0.83 | 0.89 | 0.92 | 0.97 | 0.99 | 0.98  |
| 6  | 0.20 | 0.34 | 0.46 | 0.57 | 0.64 | 0.84 | 0.89 | 0.95 | 0.96 | 0.98  |
| 7  | 0.01 | 0.01 | 0.08 | 0.08 | 0.17 | 0.15 | 0.28 | 0.32 | 0.37 | 0.45  |
| 8  | 0.02 | 0.04 | 0.07 | 0.08 | 0.15 | 0.24 | 0.22 | 0.29 | 0.39 | 0.46  |
| 9  | 0.03 | 0.07 | 0.08 | 0.06 | 0.14 | 0.29 | 0.24 | 0.37 | 0.34 | 0.41  |
| 10 | 0.24 | 0.40 | 0.62 | 0.69 | 0.88 | 0.92 | 0.97 | 0.98 | 1.00 | 1.00  |
| 11 | 0.30 | 0.42 | 0.66 | 0.79 | 0.90 | 0.94 | 0.96 | 0.98 | 1.00 | 0.99  |
| 12 | 0.29 | 0.49 | 0.61 | 0.79 | 0.89 | 0.94 | 0.97 | 0.99 | 0.98 | 1.00  |
| 13 | 0.12 | 0.27 | 0.35 | 0.52 | 0.63 | 0.76 | 0.86 | 0.93 | 0.98 | 0.98  |
| 14 | 0.08 | 0.20 | 0.40 | 0.45 | 0.73 | 0.74 | 0.83 | 0.95 | 0.97 | 0.97  |
| 15 | 0.19 | 0.21 | 0.40 | 0.49 | 0.63 | 0.77 | 0.82 | 0.91 | 0.96 | 0.97  |
| 16 | 0.34 | 0.49 | 0.65 | 0.82 | 0.92 | 0.96 | 0.96 | 0.99 | 0.98 | 0.99  |
| 17 | 0.24 | 0.38 | 0.60 | 0.68 | 0.82 | 0.95 | 0.91 | 0.97 | 1.00 | 1.00  |
| 18 | 0.21 | 0.33 | 0.44 | 0.43 | 0.56 | 0.69 | 0.87 | 0.86 | 0.93 | 0.87  |
| 19 | 0.25 | 0.56 | 0.65 | 0.85 | 0.91 | 0.97 | 0.98 | 1.00 | 1.00 | 1.00  |
| 20 | 0.32 | 0.39 | 0.62 | 0.80 | 0.91 | 0.96 | 0.99 | 0.99 | 1.00 | 1.00  |
| 21 | 0.24 | 0.37 | 0.52 | 0.77 | 0.89 | 0.93 | 0.98 | 0.97 | 1.00 | 1.00  |
| 22 | 0.36 | 0.71 | 0.81 | 0.93 | 0.97 | 0.99 | 1.00 | 1.00 | 1.00 | 1.00  |
| 23 | 0.38 | 0.63 | 0.81 | 0.91 | 0.97 | 0.99 | 1.00 | 1.00 | 1.00 | 1.00  |
| 24 | 0.46 | 0.62 | 0.74 | 0.84 | 0.96 | 0.98 | 0.99 | 0.99 | 1.00 | 1.00  |
| 25 | 0.35 | 0.58 | 0.72 | 0.84 | 0.93 | 0.99 | 0.99 | 1.00 | 1.00 | 1.00  |
| 26 | 0.22 | 0.39 | 0.57 | 0.70 | 0.87 | 0.90 | 0.96 | 0.98 | 0.98 | 1.00  |
| 27 | 0.27 | 0.24 | 0.41 | 0.50 | 0.65 | 0.69 | 0.73 | 0.85 | 0.78 | 0.79  |
| 28 | 0.24 | 0.42 | 0.54 | 0.65 | 0.73 | 0.86 | 0.95 | 0.97 | 0.98 | 1.00  |
| 29 | 0.30 | 0.38 | 0.45 | 0.49 | 0.67 | 0.79 | 0.90 | 0.94 | 0.99 | 0.96  |
| 30 | 0.20 | 0.34 | 0.44 | 0.50 | 0.61 | 0.50 | 0.63 | 0.73 | 0.67 | 0.74  |
| 31 | 0.23 | 0.27 | 0.47 | 0.56 | 0.73 | 0.85 | 0.93 | 0.97 | 0.99 | 1.00  |
| 32 | 0.15 | 0.33 | 0.55 | 0.58 | 0.73 | 0.85 | 0.92 | 0.96 | 0.99 | 0.98  |
| 33 | 0.12 | 0.29 | 0.39 | 0.49 | 0.72 | 0.76 | 0.88 | 0.96 | 0.98 | 0.98  |
| 34 | 0.18 | 0.45 | 0.54 | 0.72 | 0.89 | 0.92 | 0.96 | 1.00 | 0.99 | 0.99  |
| 35 | 0.22 | 0.39 | 0.57 | 0.68 | 0.84 | 0.94 | 0.96 | 0.98 | 1.00 | 1.00  |
| 36 | 0.12 | 0.31 | 0.45 | 0.60 | 0.71 | 0.80 | 0.85 | 0.94 | 0.95 | 0.99  |
| 37 | 0.13 | 0.22 | 0.52 | 0.65 | 0.72 | 0.88 | 0.95 | 0.99 | 0.97 | 0.99  |
| 38 | 0.15 | 0.24 | 0.37 | 0.55 | 0.74 | 0.88 | 0.96 | 0.97 | 1.00 | 0.99  |
| 39 | 0.15 | 0.13 | 0.43 | 0.51 | 0.68 | 0.87 | 0.89 | 0.96 | 0.99 | 0.99  |
| 40 | 0.17 | 0.35 | 0.53 | 0.59 | 0.79 | 0.85 | 0.96 | 0.98 | 0.99 | 1.00  |
| 41 | 0.20 | 0.27 | 0.44 | 0.58 | 0.68 | 0.87 | 0.95 | 0.97 | 1.00 | 1.00  |
| 42 | 0.16 | 0.23 | 0.32 | 0.63 | 0.76 | 0.84 | 0.90 | 0.96 | 0.99 | 1.00  |

Table 5: POD according to each scenario and each k2 value, k1 = 5

|    | k2=1 | k2=2 | k2=3 | k2=4 | k2=5 | k2=6 | k2=7 | k2=8 | k2=9 | k2=10 |
|----|------|------|------|------|------|------|------|------|------|-------|
| 1  | 0.20 | 0.20 | 0.34 | 0.44 | 0.48 | 0.62 | 0.81 | 0.80 | 0.85 | 0.91  |
| 2  | 0.13 | 0.22 | 0.36 | 0.37 | 0.60 | 0.64 | 0.78 | 0.78 | 0.87 | 0.90  |
| 3  | 0.16 | 0.16 | 0.32 | 0.45 | 0.44 | 0.59 | 0.66 | 0.73 | 0.83 | 0.87  |
| 4  | 0.22 | 0.37 | 0.47 | 0.70 | 0.74 | 0.91 | 0.96 | 0.99 | 0.99 | 0.99  |
| 5  | 0.26 | 0.41 | 0.45 | 0.57 | 0.82 | 0.92 | 0.94 | 0.92 | 0.99 | 0.99  |
| 6  | 0.14 | 0.32 | 0.46 | 0.58 | 0.60 | 0.75 | 0.89 | 0.89 | 0.95 | 0.98  |
| 7  | 0.06 | 0.03 | 0.09 | 0.08 | 0.17 | 0.18 | 0.20 | 0.23 | 0.42 | 0.55  |
| 8  | 0.04 | 0.05 | 0.02 | 0.09 | 0.17 | 0.20 | 0.24 | 0.25 | 0.38 | 0.53  |
| 9  | 0.03 | 0.04 | 0.02 | 0.11 | 0.17 | 0.16 | 0.27 | 0.30 | 0.37 | 0.40  |
| 10 | 0.29 | 0.40 | 0.64 | 0.63 | 0.83 | 0.92 | 0.96 | 0.97 | 0.97 | 1.00  |
| 11 | 0.29 | 0.43 | 0.63 | 0.67 | 0.81 | 0.84 | 0.95 | 0.97 | 0.98 | 0.99  |
| 12 | 0.22 | 0.40 | 0.59 | 0.67 | 0.86 | 0.89 | 0.96 | 0.97 | 1.00 | 1.00  |
| 13 | 0.11 | 0.18 | 0.35 | 0.49 | 0.69 | 0.77 | 0.86 | 0.93 | 0.96 | 1.00  |
| 14 | 0.10 | 0.17 | 0.31 | 0.44 | 0.73 | 0.78 | 0.81 | 0.89 | 0.98 | 0.97  |
| 15 | 0.12 | 0.16 | 0.31 | 0.42 | 0.50 | 0.67 | 0.84 | 0.90 | 0.90 | 0.92  |
| 16 | 0.24 | 0.48 | 0.57 | 0.72 | 0.79 | 0.84 | 0.90 | 0.98 | 0.99 | 1.00  |
| 17 | 0.27 | 0.42 | 0.56 | 0.63 | 0.80 | 0.91 | 0.92 | 0.91 | 0.98 | 1.00  |
| 18 | 0.19 | 0.31 | 0.35 | 0.50 | 0.56 | 0.68 | 0.78 | 0.87 | 0.87 | 0.90  |
| 19 | 0.25 | 0.46 | 0.57 | 0.68 | 0.91 | 0.95 | 0.98 | 0.98 | 1.00 | 1.00  |
| 20 | 0.30 | 0.51 | 0.55 | 0.71 | 0.89 | 0.92 | 1.00 | 0.98 | 1.00 | 1.00  |
| 21 | 0.29 | 0.42 | 0.61 | 0.75 | 0.81 | 0.93 | 0.97 | 0.97 | 0.97 | 1.00  |
| 22 | 0.45 | 0.65 | 0.72 | 0.90 | 0.97 | 0.98 | 1.00 | 1.00 | 0.99 | 1.00  |
| 23 | 0.45 | 0.57 | 0.81 | 0.86 | 0.96 | 0.97 | 1.00 | 0.99 | 1.00 | 1.00  |
| 24 | 0.37 | 0.59 | 0.71 | 0.84 | 0.94 | 0.94 | 1.00 | 0.99 | 1.00 | 1.00  |
| 25 | 0.38 | 0.55 | 0.66 | 0.86 | 0.96 | 0.99 | 0.99 | 0.99 | 1.00 | 1.00  |
| 26 | 0.31 | 0.40 | 0.48 | 0.67 | 0.76 | 0.85 | 0.88 | 0.93 | 0.96 | 0.98  |
| 27 | 0.17 | 0.29 | 0.22 | 0.49 | 0.47 | 0.58 | 0.64 | 0.74 | 0.81 | 0.76  |
| 28 | 0.23 | 0.38 | 0.55 | 0.55 | 0.80 | 0.83 | 0.84 | 0.95 | 0.96 | 0.95  |
| 29 | 0.19 | 0.28 | 0.47 | 0.66 | 0.71 | 0.80 | 0.83 | 0.90 | 0.91 | 0.98  |
| 30 | 0.32 | 0.36 | 0.37 | 0.53 | 0.44 | 0.54 | 0.62 | 0.67 | 0.63 | 0.68  |
| 31 | 0.16 | 0.20 | 0.45 | 0.52 | 0.69 | 0.78 | 0.80 | 0.93 | 0.99 | 1.00  |
| 32 | 0.14 | 0.31 | 0.33 | 0.55 | 0.67 | 0.79 | 0.86 | 0.93 | 0.94 | 1.00  |
| 33 | 0.09 | 0.19 | 0.23 | 0.44 | 0.61 | 0.77 | 0.88 | 0.87 | 0.90 | 0.97  |
| 34 | 0.28 | 0.38 | 0.43 | 0.65 | 0.78 | 0.84 | 0.92 | 0.93 | 0.97 | 0.98  |
| 35 | 0.20 | 0.35 | 0.51 | 0.52 | 0.69 | 0.83 | 0.84 | 0.93 | 0.99 | 0.99  |
| 36 | 0.20 | 0.23 | 0.42 | 0.55 | 0.65 | 0.76 | 0.83 | 0.89 | 0.91 | 0.96  |
| 37 | 0.14 | 0.21 | 0.39 | 0.53 | 0.72 | 0.78 | 0.85 | 0.89 | 0.92 | 0.98  |
| 38 | 0.17 | 0.25 | 0.48 | 0.57 | 0.69 | 0.69 | 0.88 | 0.93 | 0.93 | 0.99  |
| 39 | 0.09 | 0.25 | 0.29 | 0.54 | 0.67 | 0.71 | 0.88 | 0.92 | 0.97 | 0.97  |
| 40 | 0.12 | 0.25 | 0.35 | 0.55 | 0.72 | 0.81 | 0.89 | 0.87 | 0.96 | 0.95  |
| 41 | 0.17 | 0.30 | 0.35 | 0.50 | 0.76 | 0.70 | 0.80 | 0.92 | 0.96 | 0.97  |
| 42 | 0.17 | 0.26 | 0.30 | 0.64 | 0.58 | 0.80 | 0.85 | 0.93 | 0.95 | 0.97  |

Table 6: POD according to each scenario and each k2 value, k1 = 10
