# Supplementary material for: Evaluation and comparison of statistical methods for early temporal detection of outbreaks: A simulation-based study
Source: PubMed Central journal article supplement (PMC5513450; doi:10.1371/journal.pone.0181227), 2017-07-17
Supplement: pone.0181227.s023.pdf [file pone.0181227.s023.pdf]

# Evaluation and Comparison of Statistical Methods for Early Temporal Detection of Outbreaks: a Simulation-Based Study

Appendix S23: Radar charts of performances indicators :  
POD1week, POD, PPV, NPV, 1-FPR, Sp and Se for all 21 methods  
( $\alpha = 0.01$  for Improved Farrington, Original Farrington, Periodic  
Poisson GLM and Neg Binomial GLM, CDC and EARS C1-C3.  
 $\alpha = 0.05$  for Bayes 1-3)

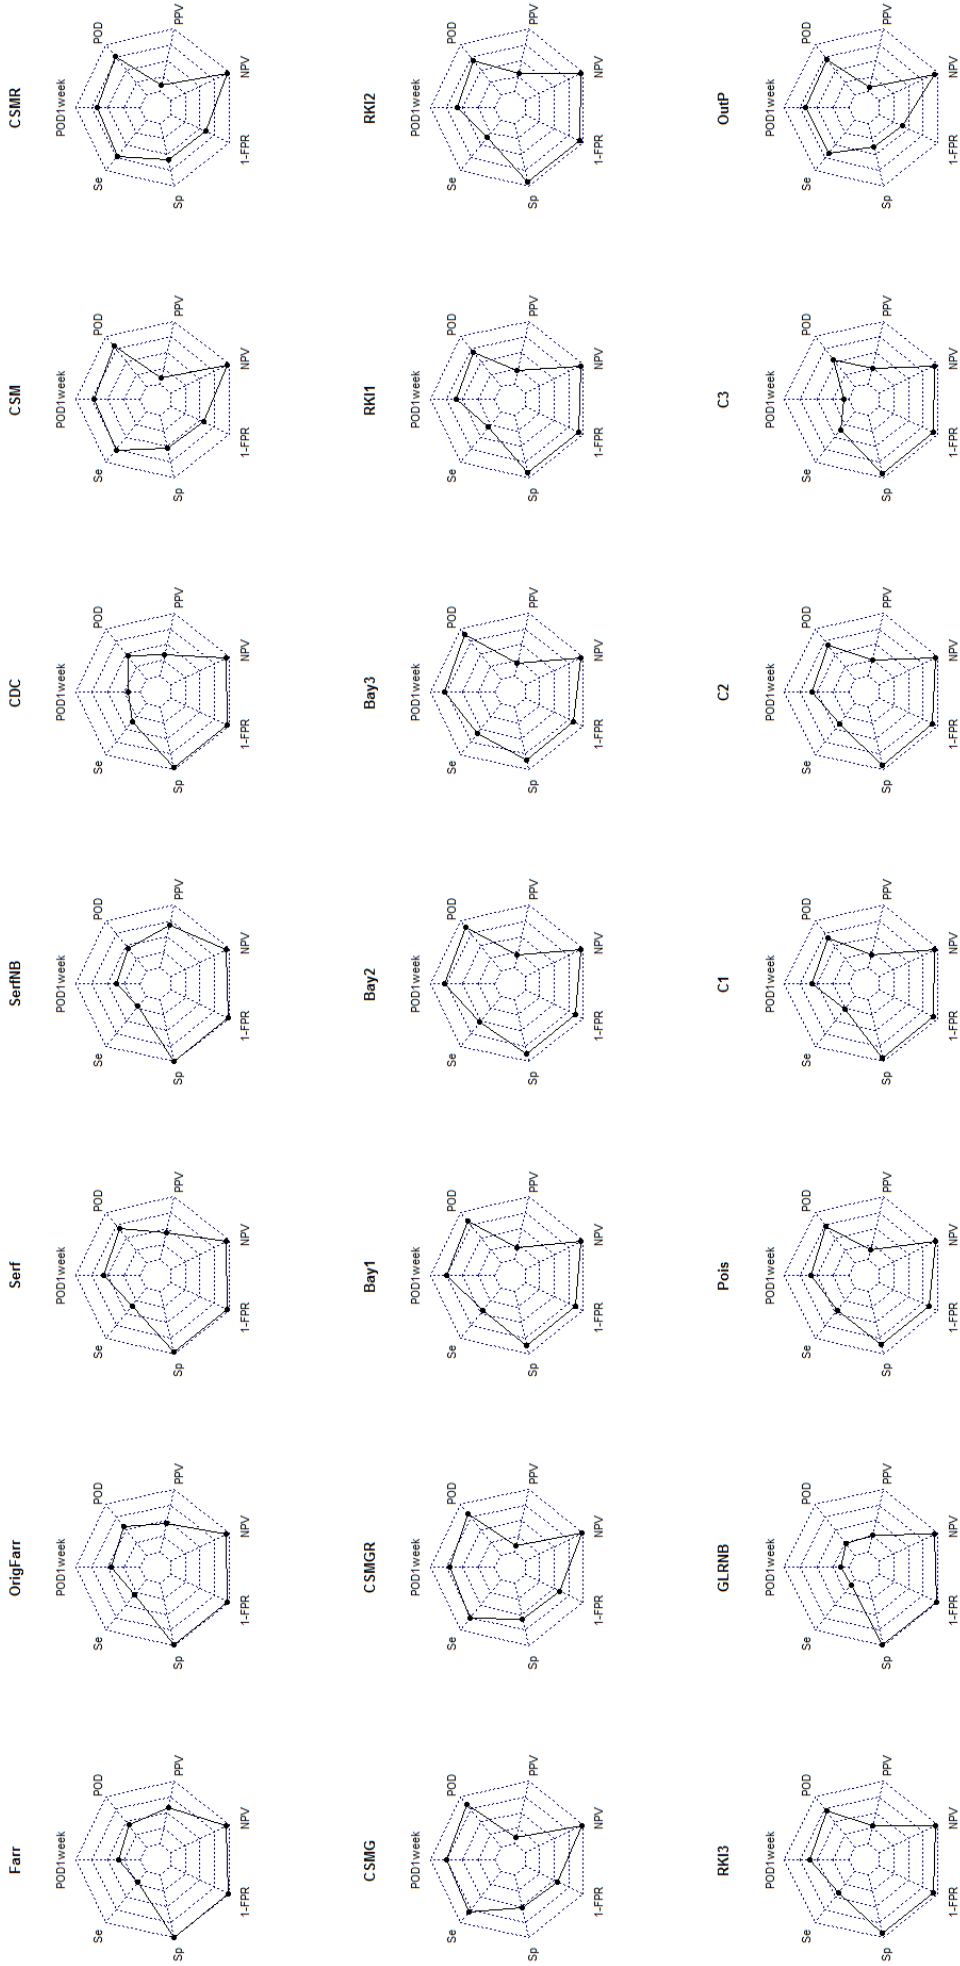

Figure 1: Radar charts of performances indicators: POD1week, POD, PPV, NPV, 1-FRR, Sp and Se for all 21 methods ( $\alpha = 0.01$  for Improved Farrington, Original Farrington, Periodic Poisson GLM and Neg Binomial GLM, CDC and EARS C1-C3.  $\alpha = 0.05$  for Bayes 1-3). Radarplot center = 0, maximum = 1. (Farr = Improved Farrington, OrigFarr = Original Farrington, Serf = Periodic Poisson GLM, SerfNB = Periodic Negative Binomial GLM, CDC = CDC algorithm, CUSUM = CUSUM, CUSUMR = CUSUM Rossi, CUSUMG = CUSUM GLM, CSMGR = GLR Poisson, CSMG = GLR Negative Binomial, C1 = EARS C1, C2 = EARS C2, C3 = EARS C3, OutP = Outbreak P). RKI2 = RKI 2, RKI3 = RKI 3, Pois = GLR Poisson, GLRNB = GLR Negative Binomial, C1 = EARS C1, C2 = EARS C2, C3 = EARS C3, OutP = Outbreak P).
