# Supplementary material for: Evaluation and comparison of statistical methods for early temporal detection of outbreaks: A simulation-based study
Source: PubMed Central journal article supplement (PMC5513450; doi:10.1371/journal.pone.0181227), 2017-07-17
Supplement: pone.0181227.s025.pdf [file pone.0181227.s025.pdf]

# Evaluation and Comparison of Statistical Methods for Early Temporal Detection of Outbreaks: a Simulation-Based Study

**Table S1: FPR, specificity, POD, POD1week, sensitivity, negative predictive value, positive predictive value and  $F_1$ -measure for 12 evaluated methods and  $\alpha = 0.001$  (for past outbreak constant  $k_1 = 0, 2, 3, 5, 10$  and current outbreak  $k_2 = 1$  to 10 for POD and sensitivity).**

| Method                    | FPR   | Specificity | POD   | POD1week | Sensitivity | NPV*  | PPV** | $F_1$ -measure |
|---------------------------|-------|-------------|-------|----------|-------------|-------|-------|----------------|
| Improved Farrington       | 0.2%  | 99.8%       | 25.7% | 19.7%    | 11.0%       | 94.4% | 75.8% | 0.19           |
| Original Farrington       | 0.9%  | 99.1%       | 41.1% | 31.8%    | 18.9%       | 94.9% | 59.1% | 0.29           |
| Periodic Poisson GLM      | 1.5%  | 98.6%       | 52.1% | 42.6%    | 25.1%       | 95.2% | 53.7% | 0.34           |
| Periodic Neg Binomial GLM | 0.1%  | 99.9%       | 24.2% | 19.5%    | 10.1%       | 94.4% | 88.7% | 0.18           |
| CDC                       | 1.3%  | 98.1%       | 32.2% | 9.8%     | 22.6%       | 95.1% | 44.4% | 0.30           |
| CUSUM                     | 44.0% | 52.7%       | 80.5% | 70.5%    | 75.4%       | 97.0% | 9.5%  | 0.17           |
| CUSUM Rossi               | 39.5% | 57.6%       | 77.0% | 65.9%    | 71.8%       | 96.9% | 10.1% | 0.18           |
| CUSUM GLM                 | 44.2% | 52.0%       | 84.4% | 73.8%    | 79.5%       | 97.5% | 9.9%  | 0.18           |
| CUSUM GLM Rossi           | 39.9% | 56.8%       | 81.1% | 69.5%    | 76.1%       | 97.3% | 10.4% | 0.18           |
| EARS C1                   | 4.0%  | 96.4%       | 52.9% | 46.5%    | 18.7%       | 94.7% | 25.4% | 0.22           |
| EARS C2                   | 5.3%  | 95.3%       | 57.0% | 46.8%    | 30.6%       | 95.4% | 29.9% | 0.30           |
| EARS C3                   | 5.2%  | 95.0%       | 47.4% | 6.0%     | 29.2%       | 95.3% | 27.8% | 0.28           |

Table 1: FPR, specificity, POD, POD1week, sensitivity, negative predictive value\*, positive predictive value\*\* and  $F_1$ -measure for 12 evaluated methods and  $\alpha = 0.001$  (for past outbreak constant  $k_1 = 0, 2, 3, 5, 10$  and current outbreak  $k_2 = 1$  to 10 for POD and sensitivity).
