# Supplementary material for: Evaluation and comparison of statistical methods for early temporal detection of outbreaks: A simulation-based study
Source: PubMed Central journal article supplement (PMC5513450; doi:10.1371/journal.pone.0181227), 2017-07-17
Supplement: pone.0181227.s026.pdf [file pone.0181227.s026.pdf]

# Evaluation and Comparison of Statistical Methods for Early Temporal Detection of Outbreaks: a Simulation-Based Study

**Table S2: FPR, specificity, POD, POD1week, sensitivity, negative predictive value, positive predictive value and  $F_1$ -measure for 15 evaluated methods and  $\alpha = 0.05$  (for past outbreak constant  $k_1 = 0, 2, 3, 5, 10$  and current outbreak  $k_2 = 1$  to 10 for POD and sensitivity).**

| <b>Method</b>             | <b>FPR</b> | <b>Specificity</b> | <b>POD</b> | <b>POD1week</b> | <b>Sensitivity</b> | <b>NPV*</b> | <b>PPV**</b> | <b><math>F_1</math>-measure</b> |
|---------------------------|------------|--------------------|------------|-----------------|--------------------|-------------|--------------|---------------------------------|
| Improved Farrington       | 3.1%       | 96.9%              | 60.4%      | 48.9%           | 31.8%              | 95.6%       | 40.3%        | 0.36                            |
| Original Farrington       | 5.6%       | 94.4%              | 70.4%      | 57.8%           | 39.7%              | 96.0%       | 31.9%        | 0.35                            |
| Periodic Poisson GLM      | 7.1%       | 93.0%              | 81.0%      | 69.0%           | 46.5%              | 96.3%       | 30.6%        | 0.37                            |
| Periodic Neg Binomial GLM | 3.3%       | 96.9%              | 69.1%      | 57.3%           | 36.0%              | 95.8%       | 43.4 %       | 0.39                            |
| CDC                       | 8.4%       | 90.4%              | 57.6%      | 30.3%           | 46.7%              | 96.3%       | 24.4%        | 0.32                            |
| CUSUM                     | 44.0%      | 52.7%              | 80.5%      | 70.5%           | 75.4%              | 97.0%       | 9.5%         | 0.17                            |
| CUSUM Rossi               | 39.5%      | 57.6%              | 77.0%      | 65.9%           | 71.8%              | 96.9%       | 10.1%        | 0.18                            |
| CUSUM GLM                 | 44.2%      | 52.0%              | 84.4%      | 73.8%           | 79.5%              | 97.5%       | 9.9%         | 0.18                            |
| CUSUM GLM Rossi           | 39.9%      | 56.8%              | 81.1%      | 69.5%           | 76.1%              | 97.3%       | 10.4%        | 0.18                            |
| Bayes 1                   | 10.1%      | 90.5%              | 76.2%      | 66.2%           | 39.1%              | 95.7%       | 21.4%        | 0.28                            |
| Bayes 2                   | 9.4%       | 91.0%              | 80.8%      | 69.4%           | 45.7%              | 96.2%       | 25.0%        | 0.32                            |
| Bayes 3                   | 11.1%      | 88.9%              | 83.4%      | 71.9%           | 51.8%              | 96.5%       | 23.6%        | 0.32                            |
| EARS C1                   | 12.0%      | 88.9%              | 78.7%      | 68.5%           | 35.5%              | 95.4%       | 17.5%        | 0.23                            |
| EARS C2                   | 13.7%      | 87.6%              | 78.3%      | 67.7%           | 48.4%              | 96.3%       | 20.5%        | 0.29                            |
| EARS C3                   | 10.8%      | 89.8%              | 60.9%      | 12.2%           | 41.8%              | 95.9%       | 21.3%        | 0.28                            |

Table 1: FPR, specificity, POD, POD1week, sensitivity, negative predictive value\*, positive predictive value\*\* and  $F_1$ -measure for 15 evaluated methods and  $\alpha = 0.05$  (for past outbreak constant  $k_1 = 0, 2, 3, 5, 10$  and current outbreak  $k_2 = 1$  to 10 for POD and sensitivity).
