# Supplementary material for: Evaluation and comparison of statistical methods for early temporal detection of outbreaks: A simulation-based study
Source: PubMed Central journal article supplement (PMC5513450; doi:10.1371/journal.pone.0181227), 2017-07-17
Supplement: pone.0181227.s027.pdf [file pone.0181227.s027.pdf]

# Evaluation and Comparison of Statistical Methods for Early Temporal Detection of Outbreaks: a Simulation-Based Study

**Table S3: Other performance ratios, adjusted on past and current outbreak duration and amplitude, trend, seasonality, dispersion and baseline frequency ( $\alpha = 0.01$  for Improved Farrington, Original Farrington, Periodic Poisson GLM and Neg Binomial GLM, CDC and EARS C1-C3.  $\alpha = 0.05$  for Bayes 1-3).**

| Covariates       | Categories/values         | Specificity ratio* | Sensitivity ratio* | Negative predictive value ratio* | Positive predictive value ratio* |
|------------------|---------------------------|--------------------|--------------------|----------------------------------|----------------------------------|
|                  |                           | (CI 95%)           | (CI 95%)           | (CI 95%)                         | (CI 95%)                         |
| Methods          | Improved Farrington       | 2.65 (2.63-2.66)   | 0.95 (0.94-0.95)   | 1.00 (1.00-1.00)                 | 8.31 (8.27-8.34)                 |
|                  | Original Farrington       | 2.61 (2.60-2.62)   | 1.34 (1.33-1.35)   | 1.01 (1.01-1.01)                 | 7.06 (7.03-7.09)                 |
|                  | Periodic Poisson GLM      | 2.59 (2.57-2.60)   | 1.64 (1.64-1.65)   | 1.01 (1.01-1.01)                 | 6.75 (6.72-6.77)                 |
|                  | Periodic Neg Binomial GLM | 2.66 (2.64-2.67)   | 0.96 (0.95-0.96)   | 1.00 (1.00-1.00)                 | 9.01 (8.96-9.04)                 |
|                  | CDC                       | 2.55 (2.54-2.56)   | 1.58 (1.57-1.59)   | 1.01 (1.01-1.01)                 | 5.56 (5.53-5.59)                 |
|                  | CUSUM                     | 1.41 (1.40-1.42)   | 3.49 (3.47-3.50)   | 1.02 (1.02-1.02)                 | 1.85 (1.85-1.86)                 |
|                  | CUSUM Rossi               | 1.54 (1.53-1.55)   | 3.32 (3.30-3.34)   | 1.02 (1.02-1.02)                 | 1.99 (1.98-2.00)                 |
|                  | CUSUM GLM                 | 1.39 (1.38-1.40)   | 3.68 (3.66-3.69)   | 1.03 (1.03-1.03)                 | 1.94 (1.94-1.95)                 |
|                  | CUSUM GLM Rossi           | 1.52 (1.51-1.53)   | 3.52 (3.50-3.54)   | 1.03 (1.03-1.03)                 | 2.09 (2.09-2.10)                 |
|                  | Bayes 1                   | 2.42 (2.41-2.43)   | 1.81 (1.80-1.81)   | 1.01 (1.01-1.01)                 | 3.61 (3.60-3.62)                 |
|                  | Bayes 2                   | 2.43 (2.42-2.44)   | 2.11 (2.10-2.12)   | 1.01 (1.01-1.01)                 | 4.21 (4.20-4.23)                 |
|                  | Bayes 3                   | 2.38 (2.36-2.39)   | 2.93 (2.38-2.40)   | 1.02 (1.02-1.02)                 | 4.11 (4.10-4.12)                 |
|                  | RKI 1                     | 2.47 (2.45-2.48)   | 1.41 (1.40-1.41)   | 1.00 (1.00-1.00)                 | 3.45 (3.44-3.47)                 |
|                  | RKI 2                     | 2.53 (2.52-2.54)   | 1.60 (1.59-1.60)   | 1.01 (1.01-1.01)                 | 5.03 (5.01-5.05)                 |
|                  | RKI 3                     | 2.49 (2.47-2.50)   | 1.93 (1.92-1.94)   | 1.01 (1.01-1.01)                 | 4.91 (4.90-4.93)                 |
|                  | GLR Negative Binomial     | 2.55 (2.54-2.57)   | Ref (-)            | Ref (-)                          | 4.73 (4.71-4.76)                 |
|                  | GLR Poisson               | 2.26 (2.25-2.27)   | 2.12 (2.11-2.13)   | 1.01 (1.01-1.01)                 | 3.34 (3.33-3.36)                 |
|                  | EARS C1                   | 2.50 (2.49-2.52)   | 1.18 (1.18-1.19)   | 1.00 (1.00-1.00)                 | 3.45 (3.44-3.47)                 |
|                  | EARS C2                   | 2.47 (2.46-2.48)   | 1.80 (1.79-1.81)   | 1.01 (1.01-1.01)                 | 4.16 (4.15-4.18)                 |
|                  | EARS C3                   | 2.48 (2.47-2.50)   | 1.63 (1.62-1.64)   | 1.01 (1.01-1.01)                 | 4.15 (4.13-4.17)                 |
| OutbreakP        | Ref (-)                   | 3.06 (3.04-3.07)   | 1.00 (1.00-1.00)   | Ref (-)                          |                                  |
| $k_1$            | 0                         | Ref (-)            | Ref (-)            | Ref (-)                          | Ref (-)                          |
|                  | 2                         | 1.00 (1.00-1.00)   | 0.99 (0.99-0.99)   | 1.00 (1.00-1.00)                 | 1.01 (1.01-1.01)                 |
|                  | 3                         | 1.00 (1.00-1.00)   | 0.98 (0.98-0.98)   | 1.00 (1.00-1.00)                 | 1.02 (1.02-1.02)                 |
|                  | 5                         | 1.01 (1.01-1.01)   | 0.96 (0.96-0.97)   | 1.00 (1.00-1.00)                 | 1.02 (1.02-1.02)                 |
|                  | 10                        | 1.01 (1.01-1.01)   | 0.93 (0.93-0.93)   | 1.00 (1.00-1.00)                 | 1.03 (1.03-1.03)                 |
| $k_2$            | 1                         | Ref (-)            | Ref (-)            | Ref (-)                          | Ref (-)                          |
|                  | 2                         | 1.00 (1.00 - 1.00) | 1.23 (1.23 - 1.23) | 1.00 (1.00-1.00)                 | 1.33 (1.32-1.33)                 |
|                  | 3                         | 1.00 (1.00 - 1.00) | 1.47 (1.47 - 1.48) | 1.00 (1.00-1.00)                 | 1.63 (1.63-1.64)                 |
|                  | 4                         | 1.00 (1.00 - 1.00) | 1.73 (1.73 - 1.73) | 1.00 (1.00-1.00)                 | 1.91 (1.91-1.92)                 |
|                  | 5                         | 1.00 (0.99 - 1.00) | 1.99 (1.98 - 1.99) | 1.00 (1.00-1.00)                 | 2.17 (2.16-2.17)                 |
|                  | 6                         | 0.99 (0.99 - 0.99) | 2.23 (2.22 - 2.24) | 1.00 (1.00-1.00)                 | 2.38 (2.38-2.39)                 |
|                  | 7                         | 0.99 (0.99 - 0.99) | 2.44 (2.44 - 2.45) | 1.00 (1.00-1.01)                 | 2.56 (2.55-2.57)                 |
|                  | 8                         | 0.99 (0.99 - 0.99) | 2.62 (2.61 - 2.63) | 1.01 (1.01-1.01)                 | 2.70 (2.69-2.71)                 |
|                  | 9                         | 0.99 (0.99 - 0.99) | 2.75 (2.74 - 2.76) | 1.01 (1.01-1.01)                 | 2.79 (2.78-2.80)                 |
|                  | 10                        | 0.99 (0.99 - 0.99) | 2.82 (2.81 - 2.83) | 1.01 (1.01-1.01)                 | 2.84 (2.83-2.85)                 |
|                  | Trend                     | No                 | Ref (-)            | Ref (-)                          | Ref (-)                          |
| Yes              |                           | 0.84 (0.84 - 0.84) | 1.20 (1.20 - 1.20) | 1.00 (1.00-1.00)                 | 0.61 (0.61-0.61)                 |
| Seasonality      | No                        | Ref (-)            | Ref (-)            | Ref (-)                          | Ref (-)                          |
|                  | Annual                    | 0.99 (0.99 - 0.99) | 0.97 (0.97 - 0.97) | 1.00 (1.00-1.00)                 | 0.95 (0.95-0.95)                 |
|                  | Biannual                  | 0.98 (0.98 - 0.98) | 0.92 (0.92 - 0.92) | 1.00 (1.00-1.00)                 | 0.86 (0.86-0.86)                 |
| Dispersion       | 1                         | Ref (-)            | Ref (-)            | Ref (-)                          | Ref (-)                          |
|                  | 1.1                       | 1.00 (1.00 - 1.00) | 1.00 (1.00 - 1.00) | 1.00 (1.00-1.00)                 | 1.00 (0.99-1.00)                 |
|                  | 1.2                       | 1.00 (1.00 - 1.00) | 0.99 (0.99 - 0.99) | 1.00 (1.00-1.00)                 | 0.99 (0.99-0.99)                 |
|                  | 1.5                       | 0.99 (0.99 - 0.99) | 0.98 (0.98 - 0.98) | 1.00 (1.00-1.00)                 | 0.97 (0.97-0.97)                 |
|                  | 2                         | 0.99 (0.99 - 0.99) | 0.98 (0.97 - 0.98) | 1.00 (1.00-1.00)                 | 0.94 (0.94-0.95)                 |
|                  | 3                         | 0.98 (0.98 - 0.98) | 0.98 (0.98 - 0.99) | 1.00 (1.00-1.00)                 | 0.90 (0.89-0.90)                 |
| Frequency        | 5                         | 0.97 (0.97 - 0.97) | 1.11 (1.11 - 1.11) | 1.00 (1.00-1.00)                 | 0.95 (0.95-0.95)                 |
|                  | -2 (0.14 cases)           | Ref (-)            | Ref (-)            | Ref (-)                          | Ref (-)                          |
|                  | 0.1 (1.1 cases)           | 0.99 (0.99 - 0.99) | 0.95 (0.94 - 0.95) | 1.00 (1.00-1.00)                 | 0.94 (0.94-0.94)                 |
|                  | 0.5 (1.65 cases)          | 0.98 (0.98 - 0.98) | 0.94 (0.94 - 0.94) | 0.99 (0.99-0.99)                 | 0.92 (0.92-0.92)                 |
|                  | 1.5 (4.48 cases)          | 0.97 (0.97 - 0.98) | 0.92 (0.92 - 0.93) | 0.99 (0.99-0.99)                 | 0.90 (0.90-0.90)                 |
|                  | 2.5 (12.18 cases)         | 0.98 (0.98 - 0.98) | 0.90 (0.89 - 0.90) | 0.99 (0.99-0.99)                 | 0.92 (0.92-0.92)                 |
|                  | 3.75 (42.52 cases)        | 1.02 (1.02 - 1.02) | 0.84 (0.84 - 0.84) | 0.98 (0.98-0.98)                 | 1.10 (1.10-1.10)                 |
| 5 (148.41 cases) | 1.13 (1.13 - 1.13)        | 0.77 (0.77 - 0.77) | 0.98 (0.98-0.98)   | 1.71 (1.71-1.71)                 |                                  |

Table 1: Other performance ratios, adjusted on past and current outbreak duration and amplitude, trend, seasonality, dispersion and baseline frequency. (baseline frequency of cases between brackets) ( $\alpha = 0.01$  for Improved Farrington, Original Farrington, Periodic Poisson GLM and Neg Binomial GLM, CDC and EARS C1-C3.  $\alpha = 0.05$  for Bayes 1-3). \* Each ratio was statistically significant with  $p \leq 10e - 3$ .
